# Supplementary material
Source: PubMed Central journal article supplement (PMC5635821)
Supplement: NIHMS875851-supplement-supplemental_info.pdf [file NIHMS875851-supplement-supplemental_info.pdf]

## Supporting Information

### **Daphnane Diterpenes from *Daphne genkwa* Activate Nurr1 and Have a Neuroprotective Effect in an Animal Model of Parkinson's Disease**

Baek-Soo Han,<sup>†,¶</sup> Kyoung-Shim Kim,<sup>§,¶</sup> Yu Jin Kim,<sup>⊥</sup> Hoe-Yune Jung,<sup>†</sup> Young-Mi Kang,<sup>§</sup> Kyu-Suk Lee,<sup>†</sup> Mi-Jin Sohn,<sup>⊥</sup> Chun-Hyung Kim,<sup>||, ∇</sup> Kwang-Soo Kim,<sup>||</sup> and Won-Gon Kim<sup>\*,⊥</sup>

<sup>†</sup>Functional Genomics Research Center, Korea Research Institute of Bioscience and Biotechnology, Daejeon 34141, Republic of Korea

<sup>§</sup>Laboratory Animal Resource Center, Korea Research Institute of Bioscience and Biotechnology, Daejeon 34141, Republic of Korea

<sup>⊥</sup>Superbacteria Research Center, Korea Research Institute of Bioscience and Biotechnology, Daejeon 34141, Republic of Korea

<sup>||</sup>Molecular Neurobiology Laboratory, McLean Hospital and Program in Neuroscience, Harvard Medical School, Belmont, MA 02478

<sup>∇</sup>Paeon Biotechnology Inc., Daejeon 34031, Republic of Korea

<sup>‡</sup>These authors contributed equally to this work.

## **Materials and Methods**

### ***Stepping test (Adjusting steps)***

At 1 week before 6-OHDA lesion and 2, 4, 5 and 6 weeks after 6-OHDA lesion, the rats were tested for hindlimb akinesia in stepping test. The rat was held in the same position with one paw touching the table and was then moved slowly sideways (5 sec for 0.9 m) by the experimenter. The number of adjusting steps was counted for both hind paws in the forward directions of movement. The test was repeated four times each day.<sup>1</sup>

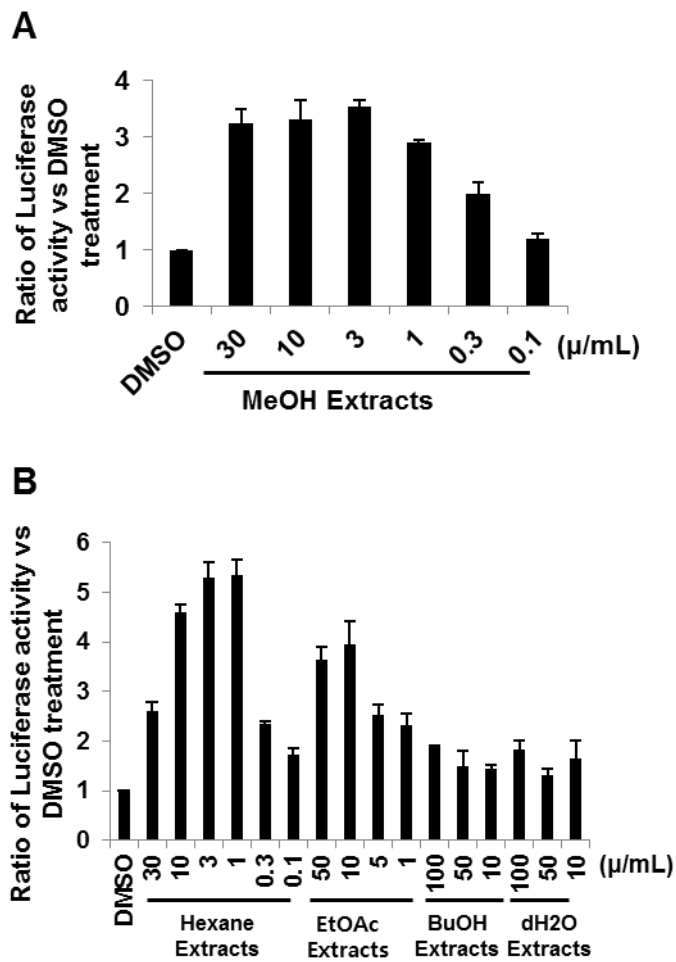

**Figure S1.** Activation of Nurr1 with extracts from *D. genkwa*. (A) Luciferase assay to measure Nurr1 activity with MeOH extract from *D. genkwa*, (B) and with hexane, EtOAc, BuOH, and dH<sub>2</sub>O extracts. Human neuroblastoma SK-N-BE(2)C cells were transfected with pTH2600LUC, pCMV Nurr1-myc, pZeoSV-Nurr1(LBD) and p8xGAL-Luc for the luciferase assay.

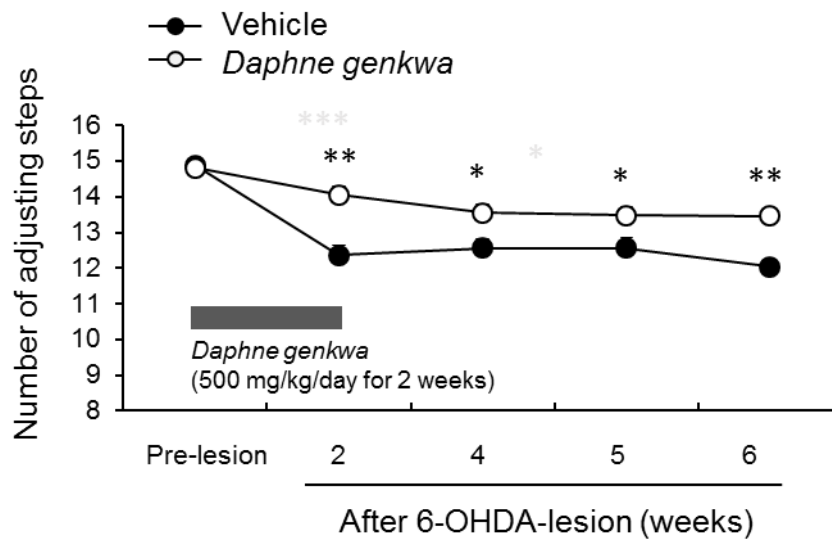

**Figure S2.** Protective effects of the methanol extract of *Daphne genkwa* in vivo 6-OHDA model. Adjusting steps in the contralateral hindlimb in the rats. The performance of the right paw was severely impaired by the 6-OHDA lesion. Adjusting steps of the contralateral hindlimb was significantly improved by administration of *Daphne genkwa* (500 mg/kg/day for 2 weeks) in all time points ( $n = 9-11$ , Student's  $t$ -test,  $*p < 0.05$  and  $**p < 0.01$ ).

Table S1. NMR Spectroscopic data (300 MHz, CD<sub>3</sub>OD) of **1**.

| No.      | $\delta_C$ , type     | $\delta_H$ ( $J$ in Hz)        |
|----------|-----------------------|--------------------------------|
| 1        | 37.2 CH <sub>2</sub>  | 1.89, 2.28 m                   |
| 2        | 35.2 CH               | 2.27, m                        |
| 3        | 83.1 CH               | 5.20, d (3.9)                  |
| 4        | 83.0 C                | -                              |
| 5        | 73.8 CH               | 4.00, s                        |
| 6        | 63.1 C                | -                              |
| 7        | 65.1 CH               | 3.41, s                        |
| 8        | 37.9 CH               | 3.09, d (3.0)                  |
| 9        | 82.1 C                | -                              |
| 10       | 49.4 CH               | 2.95, m                        |
| 11       | 36.6 CH               | 2.60, m                        |
| 12       | 37.3 CH <sub>2</sub>  | 1.70, d (14.1), 2.28, d (14.1) |
| 13       | 86.1 C                | -                              |
| 14       | 84.0 CH               | 4.56, d (2.7)                  |
| 15       | 148.5 C               | -                              |
| 16       | 111.4 CH <sub>2</sub> | 5.05, br s, 4.89, t (1.5)      |
| 17       | 19.5 CH <sub>3</sub>  | 1.81, s                        |
| 18       | 21.6 CH <sub>3</sub>  | 1.35, d (6.9)                  |
| 19       | 14.0 CH <sub>3</sub>  | 1.08, d (5.7)                  |
| 20       | 66.2 CH <sub>2</sub>  | 3.99, d (12.3), 3.61, d (12.0) |
| 1'       | 118.7 C               | -                              |
| 2'       | 138.2 C               | -                              |
| 3', 7'   | 127.4 CH              | 7.70, m                        |
| 4', 6'   | 128.9 CH              | 7.37, m                        |
| 5'       | 130.3 CH              | 7.36, m                        |
| 1''      | 168.5 C               | -                              |
| 2''      | 131.8 C               | -                              |
| 3'', 7'' | 130.7 CH              | 8.06, d (7.5)                  |
| 4'', 6'' | 129.8 CH              | 7.51, t (7.5)                  |
| 5''      | 134.5 CH              | 7.62, d (7.5)                  |

The assignments were aided by <sup>1</sup>H, <sup>13</sup>C, NOESY, HMQC, and HMBC.

Table S2. NMR Spectroscopic data (300 MHz, CD<sub>3</sub>OD) of **2**.

| No.      | $\delta_C$ , type     | $\delta_H$ ( $J$ in Hz)         |
|----------|-----------------------|---------------------------------|
| 1        | 160.2 CH              | 7.58, brs                       |
| 2        | 138.3 C               | -                               |
| 3        | 209.9 C               | -                               |
| 4        | 74.6 C                | -                               |
| 5        | 71.6 CH               | 4.10, s                         |
| 6        | 63.4 C                | -                               |
| 7        | 64.9 CH               | 3.61, s                         |
| 8        | 37.1 CH               | 3.66, s                         |
| 9        | 80.0 C                | -                               |
| 10       | 48.9 CH               | 3.89, m                         |
| 11       | 45.3 CH               | 2.61, d (7.2)                   |
| 12       | 80.4 CH               | 5.17, s                         |
| 13       | 85.4 C                | -                               |
| 14       | 81.8 CH               | 5.05, d (2.4)                   |
| 15       | 145.2 C               | -                               |
| 16       | 114.0 CH <sub>2</sub> | 4.99, s, 5.07, s                |
| 17       | 19.1 CH <sub>3</sub>  | 1.86, s                         |
| 18       | 18.9 CH <sub>3</sub>  | 1.35, d (7.5)                   |
| 19       | 10.1 CH <sub>3</sub>  | 1.75, m                         |
| 20       | 65.3 CH <sub>2</sub>  | 4.03, d (12.3) , 3.65, d (12.0) |
| 1'       | 118.4 C               | -                               |
| 2'       | 124.4 CH              | 5.64, d (15.6)                  |
| 3'       | 136.0 CH              | 6.66, dd (15.3, 10.8)           |
| 4'       | 130.2 CH              | 6.11, dd (15.3, 11.1)           |
| 5'       | 140.0 CH              | 5.89, m                         |
| 6'       | 33.8 CH <sub>2</sub>  | 2.14, d (7.2)                   |
| 7'       | 30.0 CH <sub>2</sub>  | 1.44, m                         |
| 8'       | 32.7 CH <sub>2</sub>  | 1.33, m                         |
| 9'       | 23.7 CH <sub>2</sub>  | 1.31, m                         |
| 10'      | 14.5 CH <sub>3</sub>  | 0.91, t (6.9)                   |
| 1''      | 167.1 C               | -                               |
| 2''      | 131.3 C               | -                               |
| 3'', 7'' | 130.8 CH <sub>2</sub> | 7.95, d (7.2)                   |
| 4'', 6'' | 129.9 CH <sub>2</sub> | 7.47, t (7.2)                   |
| 5''      | 134.6 CH <sub>2</sub> | 7.60, t (7.2)                   |

The assignments were aided by <sup>1</sup>H, <sup>13</sup>C, NOESY, HMQC, and HMBC

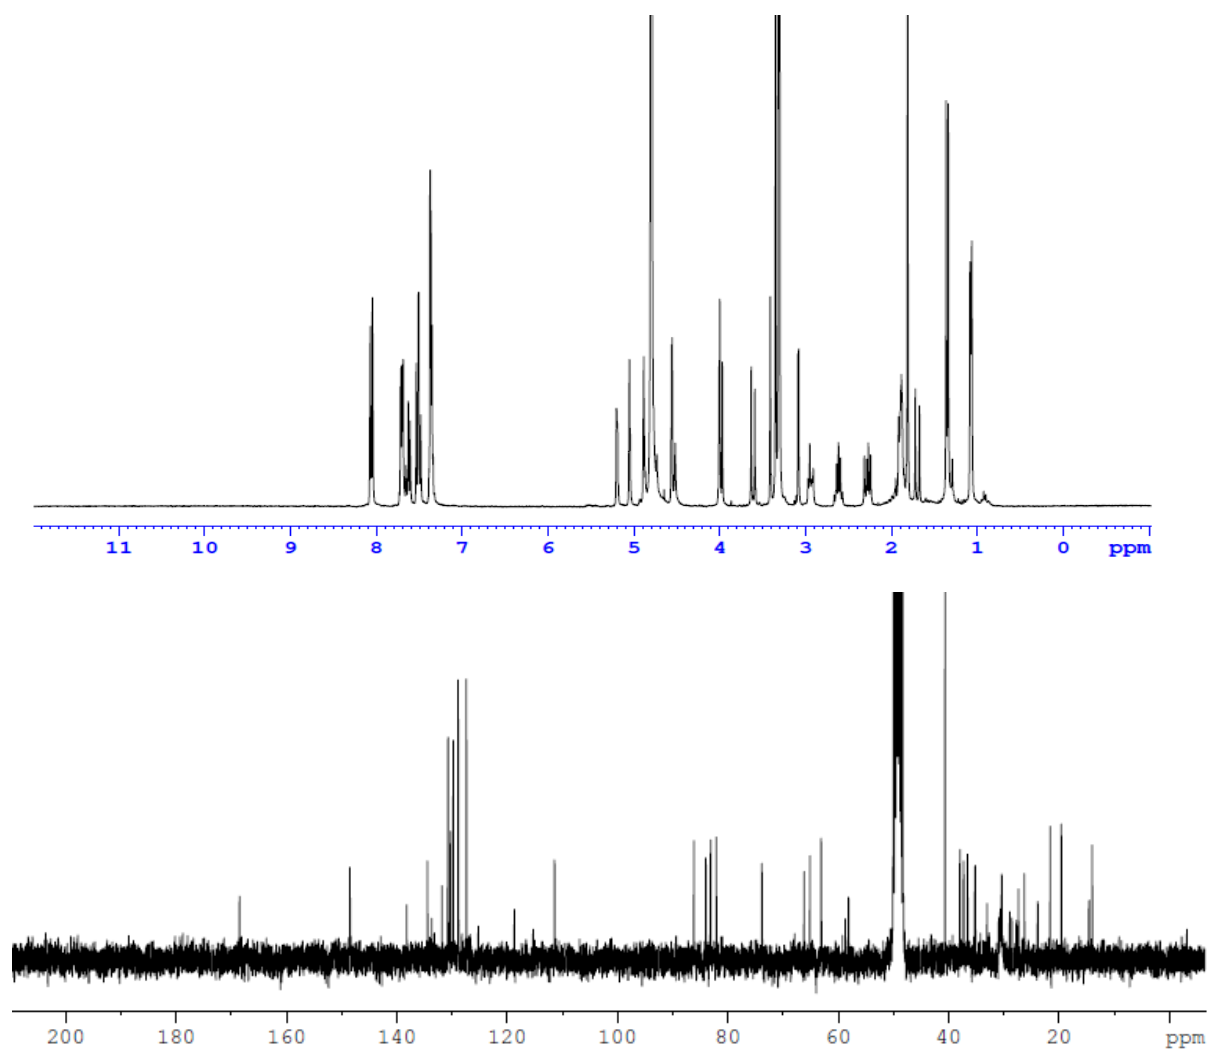

**Figure S3.** <sup>1</sup>H and <sup>13</sup>C NMR spectra of **1** in CD<sub>3</sub>OD measured at 300 and 75 MHz, respectively.

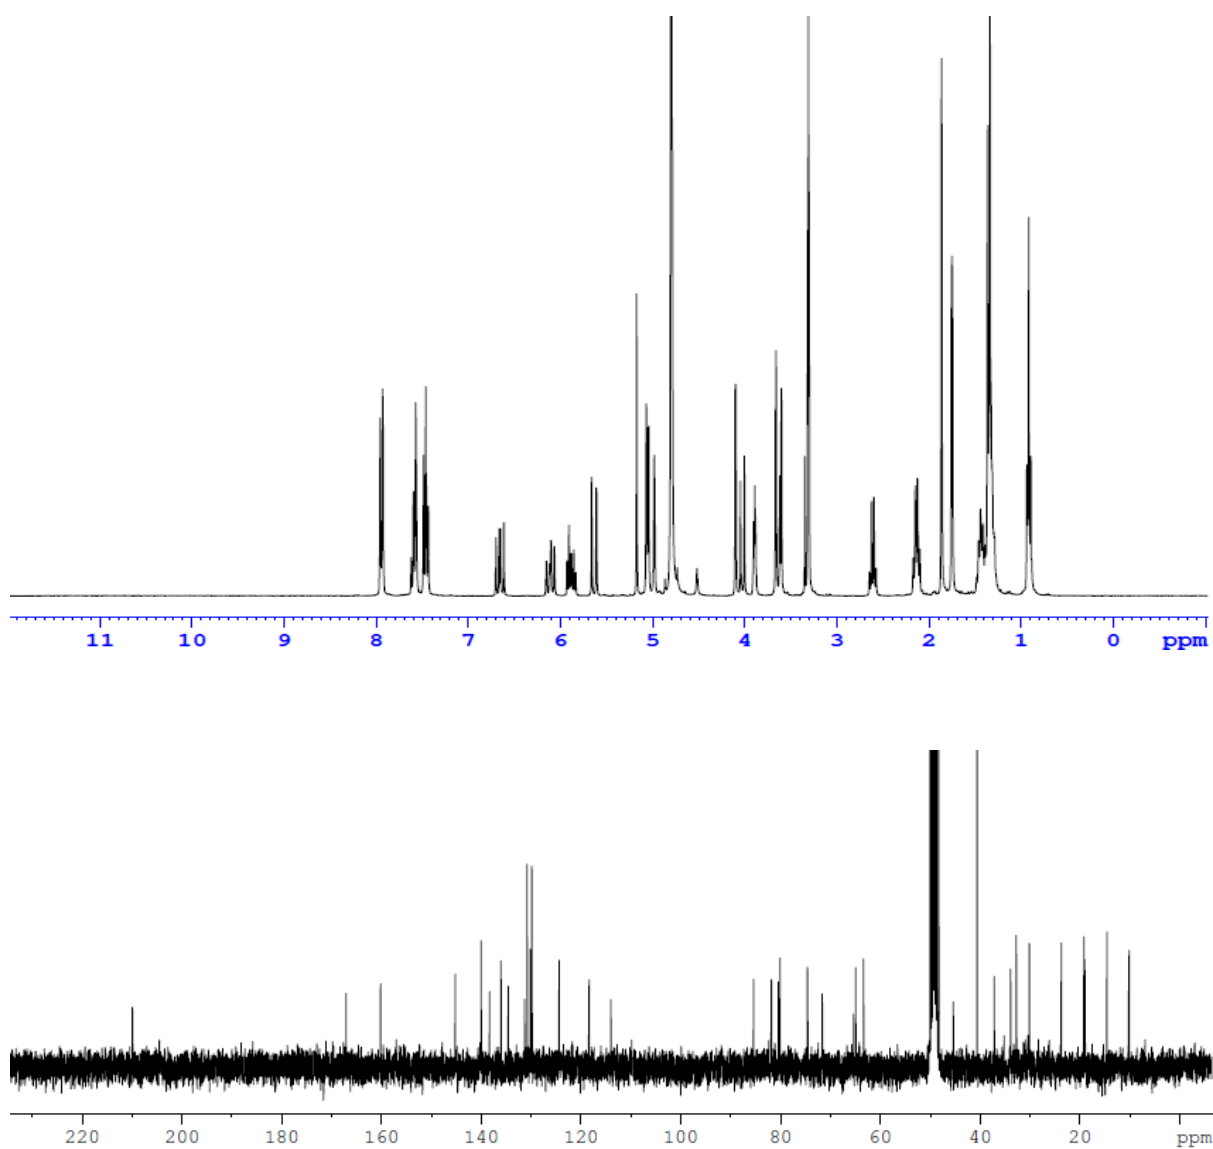

**Figure S4.** <sup>1</sup>H and <sup>13</sup>C NMR spectra of **2** in CD<sub>3</sub>OD measured at 300 and 75 MHz, respectively.

## Reference

- (1) Olsson, M.; Nikkhah, G.; Bentlage, C.; Bjorklund, A. *J. Neurosci.* **1995**, *15*, 3863-3875.
